# Supplementary material for: Developing a Bayesian hierarchical model for a prospective individual patient data meta-analysis with continuous monitoring
Source: Springer Nature journal article supplement (doi:10.1186/s12874-022-01813-4), 2023-01-25
Supplement: MOESM5 [file 23953534]

746 Additional file 5 — The true value of parameters in the data generation process

| Parameter                     | True value |
|-------------------------------|------------|
| $\Delta_{co}$                 | -0.400     |
| $\delta_1$                    | 0.300      |
| $\delta_2$                    | 0.400      |
| $\delta_3$                    | 0.500      |
| $\beta_{who_{enroll}=5 4}^a$  | 0.060      |
| $\beta_{who_{enroll}=6 5}$    | 0.120      |
| $\beta_{age=2 1}^b$           | 0.075      |
| $\beta_{age=3 1}$             | 0.150      |
| $\beta_{gender=1 0}^c$        | 0.100      |
| $\beta_{Symptom\ Days=2 1}^d$ | 0.050      |
| $\beta_{Symptom\ Days=3 1}$   | 0.100      |
| $\beta_{Symptom\ Days=4 1}$   | 0.150      |
| $\beta_{Symptom\ Days=5 1}$   | 0.200      |
| $\alpha$                      | 0.000      |

<sup>a</sup> WHO score at baseline

<sup>b</sup> Age: 1 = < 50 years old; 2 = [50,65); 3 =  $\geq$  65 years old

<sup>c</sup> Gender: 0 = female; 1 = male

<sup>d</sup> Duration of symptoms before randomization: 1 = 0-3 days;

2 = 4-6 days; 3 = 7-10 days; 4 = 11-14 days; 5 = 14+ days

**Table A2** The true value of parameters in the data generation process.
