# Supplementary material for: Developing a Bayesian hierarchical model for a prospective individual patient data meta-analysis with continuous monitoring
Source: Springer Nature journal article supplement (doi:10.1186/s12874-022-01813-4), 2023-01-25
Supplement: MOESM7 [file 23953534]

1008 Additional file 7 — Assessing models using a different set of effect sizes

1009 The data were simulated as in Section [Simulation setup - basic model](#) but with a set of relatively small effect sizes

1010  $(\delta_1, \delta_2, \delta_3) = (0.05, 0.1, 0.15)$ .

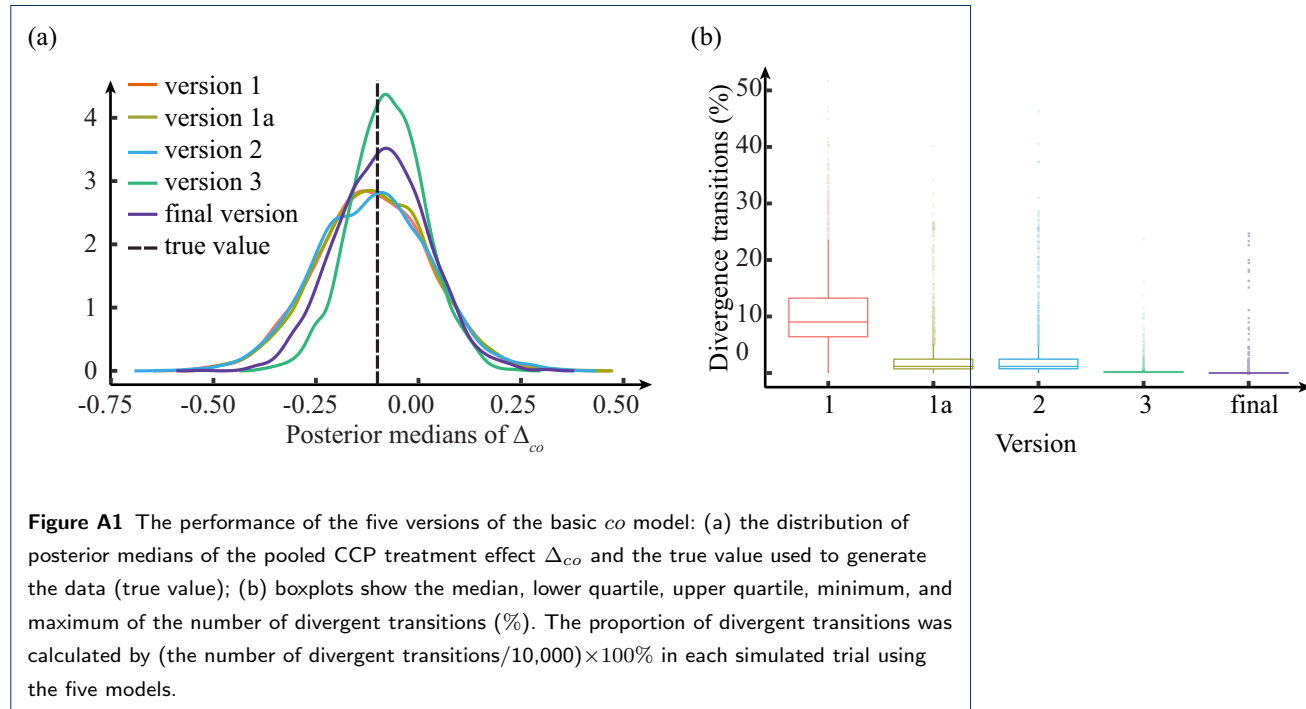

1011 As shown in [Figure A1](#), the results were consistent in this new scenario:

- 1012 • Version 1: the proportion of divergent transitions was unacceptably high.
- 1013 • Version 1(a): the divergent transitions decreased relative to version 1, but were not good enough.
- 1014 • Version 2: the divergent transitions decreased compared to version 1(a), but again were not good enough.
- 1015 • Version 3: the posterior estimation of  $\Delta_{CO}$  was extracted to the null effect due to the skeptical prior.
- 1016 • Final version: the true value was almost at the position with the highest probability. The number of
- 1017 divergent transitions was close to or at zero for nearly all simulated trials, indicating that model fitting
- 1018 converged almost every time.
