# Supplementary material for: Developing a Bayesian hierarchical model for a prospective individual patient data meta-analysis with continuous monitoring
Source: Springer Nature journal article supplement (doi:10.1186/s12874-022-01813-4), 2023-01-25
Supplement: MOESM8 [file 23953534]

1019 Additional file 8 — The effect of sample sizes on the model's performance

1020 With the final model in hand, we were able to explore the influence of our assumptions. For example, since the  
 1021 sample size in a prospective meta-analysis could not be predicted, we wanted to know the operating characteristics  
 1022 of the basic  $co$  model at different sample sizes. We simulated data as in Section [Simulation setup - basic model](#),  
 1023 which included 900 patients, and two additional scenarios: Scenario (2) that doubles the sample size and Scenario  
 1024 (3) that triples it. For each scenario, we simulated 2500 trials. We compared the accuracy of the estimation.

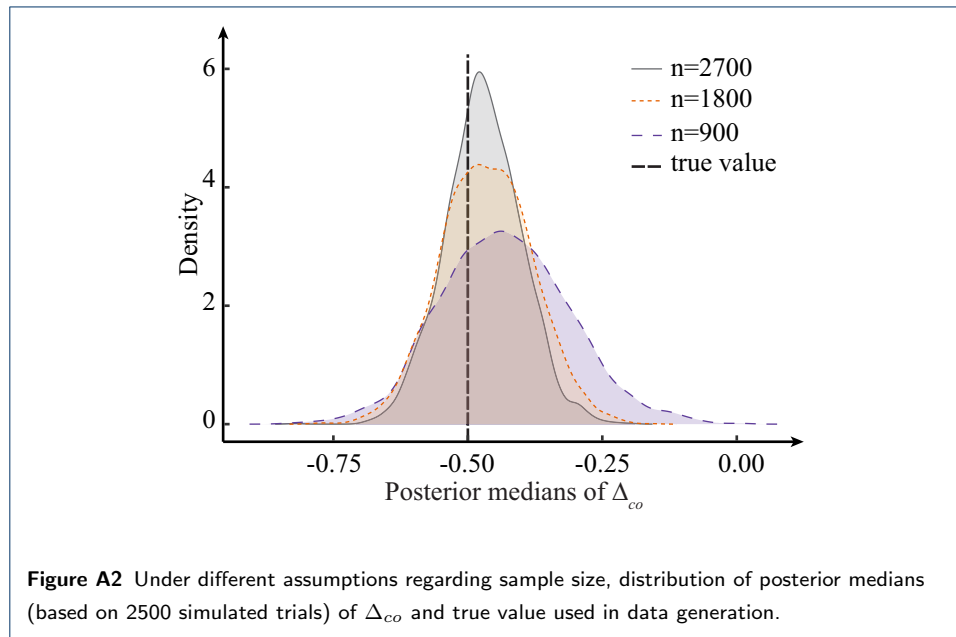

1025 As the sample size increased (see [Figure A2](#)), the distribution of posterior medians shifted away from 0 towards the  
 1026 true value. This clearly indicates that a larger sample is required to overcome the postulated highly skeptical prior  
 1027 distribution and demonstrate the effect of CCP treatment.
