# Supplementary material for: Developing a Bayesian hierarchical model for a prospective individual patient data meta-analysis with continuous monitoring
Source: Springer Nature journal article supplement (doi:10.1186/s12874-022-01813-4), 2023-01-25
Supplement: MOESM9 [file 23953534]

1028 Additional file 9 — Final model for multi-site RCTs

$$\begin{aligned}
 \text{logit}(P(Y_{kmi} \geq y)) &= \alpha + \tau_{ykm} + \beta \mathbf{X}_{kmi} + \delta_{m_k} A_{kmi} \\
 \alpha &\sim \text{Normal}(\mu = 0, \sigma = 0.1) \\
 \tau_{ykm} &\sim t_{\text{student}}(\text{df} = 3, \mu = 0, \sigma = 10) \\
 \beta &\sim \text{Normal}(\boldsymbol{\mu} = \mathbf{0}, \Sigma = 2.5^2 I_{p \times p}) \\
 \delta_{m_k} &\sim \text{Normal}(\mu = \delta_{k_c}, \sigma = 0.1) \\
 \delta_{k_c} &\sim \text{Normal}(\mu = \delta_c, \sigma = \eta) \\
 \eta &\sim t_{\text{student}}(\text{df} = 3, \mu = 0, \sigma = 0.25) \\
 \delta_c &\sim \text{Normal}(\mu = -\Delta_{co}, \sigma = 0.1) \\
 -\Delta_{co} &\sim \text{Normal}(\mu = 0, \sigma = 0.354).
 \end{aligned} \tag{A3}$$

1029 The parameters in the extended models that were in common with the basic model were set to the prior distributions  
 1030 of the final version in model (7). The extended *co* model (A3) incorporates new parameters:  $\tau_{ykm}$ , and  $\delta_{m_k}$ , which  
 1031 were selected via simulations as those described in Section [Extended model for multi-site RCTs](#). The site-specific  
 1032 intercept  $\tau_{ykm}$  was set with prior  $t_{\text{student}}(\text{df} = 3, \mu = 0, \sigma = 10)$ . The  $m^{\text{th}}$  site-specific “control effect”  $\delta_{m_k}$  was  
 1033 chosen to be normally distributed around a RCT-specific “control effect”  $\delta_{k_c}$ , with a standard deviation 0.1.
