# Supplementary material for: Developing a Bayesian hierarchical model for a prospective individual patient data meta-analysis with continuous monitoring
Source: Springer Nature journal article supplement (doi:10.1186/s12874-022-01813-4), 2023-01-25
Supplement: MOESM10 [file 23953534]

1034 Additional file 10 — Posterior estimations of parameters in the extended model for multi-site RCTs

| Parameter                     | True value | Model (7) | Model (A3) |
|-------------------------------|------------|-----------|------------|
| $\Delta_{co}$                 | -0.400     | -0.361    | -0.362     |
| $\delta_1$                    | 0.300      | 0.355     | 0.356      |
| $\delta_2$                    | 0.400      | 0.371     | 0.372      |
| $\delta_3$                    | 0.500      | 0.386     | 0.386      |
| $\beta_{who_{enroll}=5 4}^a$  | 0.060      | 0.061     | 0.061      |
| $\beta_{who_{enroll}=6 5}$    | 0.120      | 0.122     | 0.122      |
| $\beta_{age=2 1}^b$           | 0.075      | 0.076     | 0.077      |
| $\beta_{age=3 1}$             | 0.150      | 0.158     | 0.159      |
| $\beta_{gender=1 0}^c$        | 0.100      | 0.107     | 0.108      |
| $\beta_{Symptom\ Days=2 1}^d$ | 0.050      | 0.051     | 0.051      |
| $\beta_{Symptom\ Days=3 1}$   | 0.100      | 0.103     | 0.104      |
| $\beta_{Symptom\ Days=4 1}$   | 0.150      | 0.158     | 0.159      |
| $\beta_{Symptom\ Days=5 1}$   | 0.200      | 0.208     | 0.209      |
| $\alpha$                      | 0.000      | -0.002    | -0.002     |

<sup>a</sup> WHO score at baseline

<sup>b</sup> Age: 1 = < 50 years old; 2 = [50,65); 3 = ≥ 65 years old

<sup>c</sup> Gender: 0 = female; 1 = male

<sup>d</sup> Duration of symptoms before randomization: 1 = 0-3 days;

2 = 4-6 days; 3 = 7-10 days; 4 = 11-14 days; 5 = 14+ days

**Table A3** Mean of estimated posterior medians of each parameter based on 3000 simulated trials.
