# Supplementary material for: Developing a Bayesian hierarchical model for a prospective individual patient data meta-analysis with continuous monitoring
Source: Springer Nature journal article supplement (doi:10.1186/s12874-022-01813-4), 2023-01-25
Supplement: MOESM11 [file 23953534]

1035 Additional file 11 — Final model for assessing heterogeneity of treatment effect

$$\begin{aligned}
 \text{logit}(P(Y_{ki} \geq y)) &= \alpha + \tau_{yk} + \beta \mathbf{X}_{ki} + A_{ki} (\delta_{k_c} + \gamma_{(ks)_c} d_{kis}) \\
 \alpha &\sim \text{Normal}(\mu = 0, \sigma = 0.1) \\
 \tau_{yk} &\sim t_{\text{student}}(\text{df} = 3, \mu = 0, \sigma = 8) \\
 \beta &\sim \text{Normal}(\boldsymbol{\mu} = \mathbf{0}, \Sigma = 2.5^2 I_{p \times p}) \\
 \delta_{k_c} &\sim \text{Normal}(\mu = \delta_c, \sigma = \eta) \\
 \eta &\sim t_{\text{student}}(\text{df} = 3, \mu = 0, \sigma = 0.25) \\
 \delta_c &\sim \text{Normal}(\mu = -\Delta, \sigma = 0.1) \\
 -\Delta &\sim t_{\text{student}}(\text{df} = 3, \mu = 0, \sigma = 2.5) \\
 \gamma_{(ks)_c} &\sim \text{Normal}(\mu = \gamma_{cs}, \sigma = 1) \\
 \gamma_{cs} &\sim \text{Normal}(\mu = -\Gamma_s, \sigma = 0.25) \\
 -\Gamma_s &\sim t_{\text{student}}(\text{df} = 3, \mu = 0, \sigma = 1.5)
 \end{aligned} \tag{A4}$$

1036 The pooled effect of CCP (measured by log OR) across all RCTs for patients with covariate  $S = s$  will be

$$1037 \Delta_s = \Delta + \Gamma_s.$$

1038 The prior distribution of  $\Delta_s$  is less skeptical than  $\Delta_{co}$  in model (7) because we are interested in estimating the  
 1039 treatment effect in each stratum of  $S$  instead of assessing evidence for overall efficacy. A less skeptical prior spreads  
 1040 out the probability mass, and will not shrink the posterior estimate strongly towards zero; this allows the observed  
 1041 data to have greater influence over the posterior distribution.

1042 The introduction of parameters  $-\Delta$  and  $-\Gamma_s$  required additional prior distribution assumptions. We found that  
 1043 using  $t_{\text{student}}$  and *Normal* prior distributions resulted in similar posterior estimations and divergent transitions. The  
 1044  $t_{\text{student}}$  distribution, however, achieved slightly better model convergence and is less restrictive. Therefore, we opted  
 1045 for a  $t_{\text{student}}$  prior distribution for both  $-\Delta$  and  $-\Gamma_s$ .
