# Supplementary material for: Developing a Bayesian hierarchical model for a prospective individual patient data meta-analysis with continuous monitoring
Source: Springer Nature journal article supplement (doi:10.1186/s12874-022-01813-4), 2023-01-25
Supplement: MOESM12 [file 23953534]

1046 Additional file 12 — Final model for the binary co-primary outcome

1047 The binary outcome can be properly viewed as a subset of the ordinal outcome. The posterior probability  
 1048 distribution of the  $OR$  for the binary outcome will have greater variance than that of the overall cumulative  $OR$ ,  
 1049 but they effectively measure the same  $OR$ . While for efficient use of all available data (i.e., WHO 11-point scale),  
 1050 most statisticians would probably agree that the  $co$  model is preferred, the clinicians were reasoning that the most  
 1051 clinically important outcome is the binary measure. This logistic( $l$ ) model was included for ease of communication  
 1052 and acceptability by the clinical community.  
 1053 Assume the event  $W = 1$  if the patient has a WHO score  $\geq 7$  (and  $W = 0$  otherwise), this outcome is analyzed  
 1054 with logistic ( $l$ ) regression model as follows:

$$\begin{aligned}
 \text{logit}(P(W_{ki} = 1)) &= \tau_k + \beta \mathbf{X}_{ki} + \delta_{k_c} A_{ki} \\
 \tau_k &\sim t_{\text{student}}(\text{df} = 3, \mu = 0, \sigma = 8) \\
 \beta &\sim \text{Normal}(\mu = \mathbf{0}, \Sigma = 2.5^2 I_{p \times p}) \\
 \delta_{k_c} &\sim \text{Normal}(\mu = \delta_c, \sigma = \eta) \\
 \eta &\sim t_{\text{student}}(\text{df} = 3, \mu = 0, \sigma = 0.25) \\
 \delta_c &\sim \text{Normal}(\mu = -\Delta_l, \sigma = 0.1) \\
 -\Delta_l &\sim \text{Normal}(\mu = 0, \sigma = 0.354)
 \end{aligned} \tag{A5}$$
